# Supplementary material for: High efficiency Bi2Te3-based materials and devices for thermoelectric power generation between 100 and 300 °C
Source: Royal Society of Chemistry journal article supplement (doi:10.1039/c6ee02017h), 2016-01-01
Supplement: c6ee02017h1.pdf [file c6ee02017h1.pdf]

## Electronic Supplementary Information

### High efficiency Bi<sub>2</sub>Te<sub>3</sub>-based materials and devices for thermoelectric power

#### generation between 100 and 300 °C

Feng Hao<sup>ab</sup>, Pengfei Qiu<sup>a</sup>, Yunshan Tang<sup>a</sup>, Shengqiang Bai<sup>\*a</sup>, Tong Xing<sup>ab</sup>, Hsu-Shen Chu<sup>c</sup>,  
Qihao Zhang<sup>ab</sup>, Ping Lu<sup>a</sup>, Tiansong Zhang<sup>a</sup>, Dudi Ren<sup>a</sup>, Jikun Chen<sup>d</sup>, Xun Shi<sup>\*ae</sup>,  
Lidong Chen<sup>\*ae</sup>

<sup>a</sup> State Key Laboratory of High Performance Ceramics and Superfine Microstructure, Shanghai Institute of Ceramics, Chinese Academy of Sciences, Shanghai 200050, China.

<sup>b</sup> University of Chinese Academy of Sciences, 19 Yuquan Road, Beijing 100049, China.

<sup>c</sup> Material and Chemical Research Laboratories, Industrial Technology Research Institute, Hsinchu 31040 Taiwan.

<sup>d</sup> School of Material Science and Engineering, University of Science and Technology Beijing, Beijing 100083, China.

<sup>e</sup> Shanghai Institute of Materials Genome, Shanghai 200444, China.

#### Lattice thermal conductivity ( $\kappa_L$ ) and bipolar thermal conductivity ( $\kappa_b$ )

The  $\kappa_L$  data at 200-250 K was fitted by the expression of  $\kappa_L = aT^{-1} + b$ , where  $a$  and  $b$  are fitting parameters. As a typical example, Fig. S4c shows the fitting results for Bi<sub>0.5</sub>Sb<sub>1.5</sub>Te<sub>3</sub>. Very good agreement between the experiment data and the fitting curve (red solid line) is observed. Similar agreements are also observed in all other samples. The fitted  $a$  and  $b$  values for the samples are listed in Table S1. The  $\kappa_L$  was then extrapolated to 600 K according to the expression  $\kappa_L = aT^{-1} + b$ , which is shown in Fig. S4d. For sample Bi<sub>0.5</sub>Sb<sub>1.485</sub>Cd<sub>0.015</sub>Te<sub>3</sub>, Bi<sub>0.5</sub>Sb<sub>1.495</sub>Cu<sub>0.005</sub>Te<sub>3</sub>, and Bi<sub>0.5</sub>Sb<sub>1.494</sub>Ag<sub>0.006</sub>Te<sub>3</sub>, the  $\kappa_L$  at elevated temperatures are lower than the theoretical minimum lattice thermal conductivity ( $\kappa_{\min} = 0.31 \text{ Wm}^{-1}\text{K}^{-1}$ ) in Bi<sub>0.5</sub>Sb<sub>1.5</sub>Te<sub>3</sub> calculated by the Cahill model.<sup>1</sup> In this case,  $\kappa_{\min}$  is used as the real  $\kappa_L$  value instead of the extrapolated value. Finally, the  $\kappa_b$  for all the samples at 300-600 K was calculated by subtracting the estimated  $\kappa_L$  from experimental ( $\kappa - L\sigma T$ ).

In n-type Bi<sub>2</sub>Te<sub>3</sub>-based materials, acoustic phonon scattering is also the dominant carrier scattering mechanism around 300 K. Thus, the electron mobilities ( $\mu_e$ ) also obey the relationship of  $\mu_e \sim T^{-3/2}$ .<sup>2</sup> Based on Fig. 4a, we found that the calculated electron concentrations ( $n$ ) for all samples varies as with the empirical relationship of  $n \sim T^7$ . Thus, a qualitative expression between  $\mu_e$  and  $n$  is derived as  $\mu_e \approx Bn^{-1/5}$ , where  $B$  is a temperature independent constant for a fixed composition. Then the electron

## Electronic Supplementary Information

partial electrical conductivity  $\sigma_e$  is calculated based on parameter  $B$  and electron concentrations.

In the following numerical modeling process,  $B$  is set as an adjustable parameter and listed in Table S3. Then, Equation 7 is approximately changed to

$$\kappa_b = \left(\frac{k_B}{e}\right)^2 T \left(4 + \frac{E_g}{k_B T}\right)^2 \cdot \frac{B n^{\frac{4}{5}} \cdot p \mu_h}{B n^{\frac{4}{5}} + p \mu_h}, \quad (\text{S1})$$

where  $e$  is the free electron charge,  $\mu_h (= \mu_H)$  is the hole mobility, and  $p (= p_H)$  is the hole concentration. The  $\mu_h$  above 300 K can be extrapolated by using the measured low temperature Hall data according to the relationship of  $\mu_h(T) \sim T^{-3/2}$ . The  $p$  values above 300 K were calculated using Equation 6. Then, the temperature dependence of  $\kappa_b$  was modeled by Equation S1, which is shown in Fig. S8a. Excellent agreements between the calculations using the experimental data ( $\kappa_b = \kappa - \kappa_e - \kappa_L$ , symbols) and the fitted curves using Equation S1 (solid lines) are observed in a wide temperature range for all samples, suggesting the assumption and augment mentioned above is reasonable.

## Lorenz number ( $L$ )

Lorenz number is calculated by using the single parabolic band model according to the following expression<sup>3</sup>

$$L = \left(\frac{k_B}{e}\right)^2 \left\{ \frac{(\lambda + 7/2)F_{\lambda+5/2}(\eta_h)}{(\lambda + 3/2)F_{\lambda+1/2}(\eta_h)} - \left[ \frac{(\lambda + 5/2)F_{\lambda+3/2}(\eta_h)}{(\lambda + 3/2)F_{\lambda+1/2}(\eta_h)} \right]^2 \right\} \quad (\text{S2})$$

where  $\lambda$  is the carrier scattering parameter which is taken as  $-1/2$ ,  $\eta_h$  is the reduced Fermi energy,  $F_x$  is the Fermi integral of the order of  $x$ . The calculated values for our materials are listed in Table S1.

## Electronic Supplementary Information

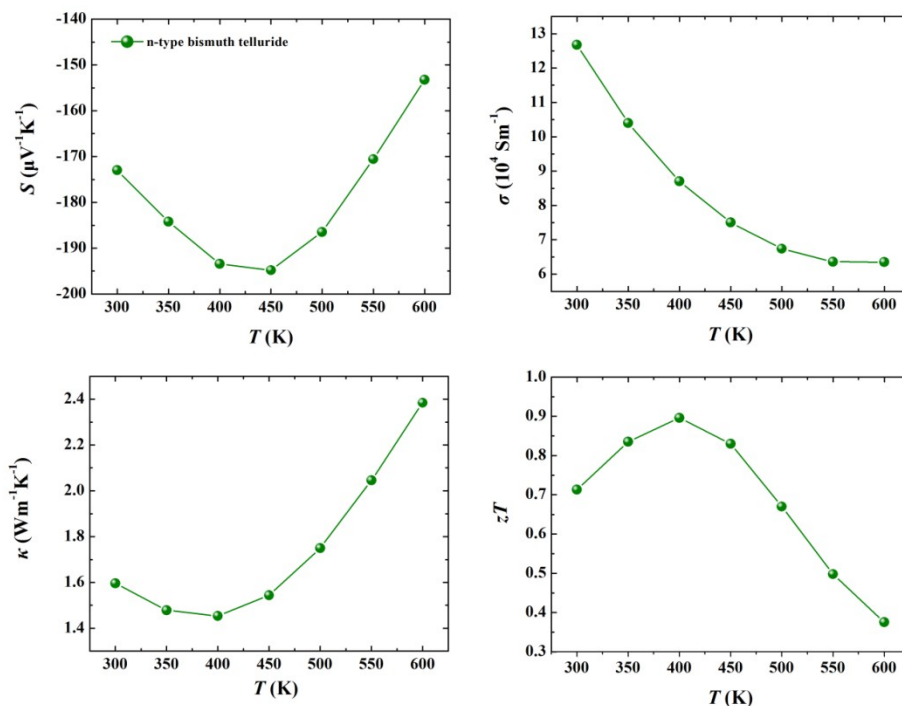

**Fig. S1** Temperature dependences of (a) Seebeck coefficient, (b) electrical conductivity, (c) thermal conductivity, and TE figure of merit ( $zT$ ) for commercial n-type bismuth telluride.

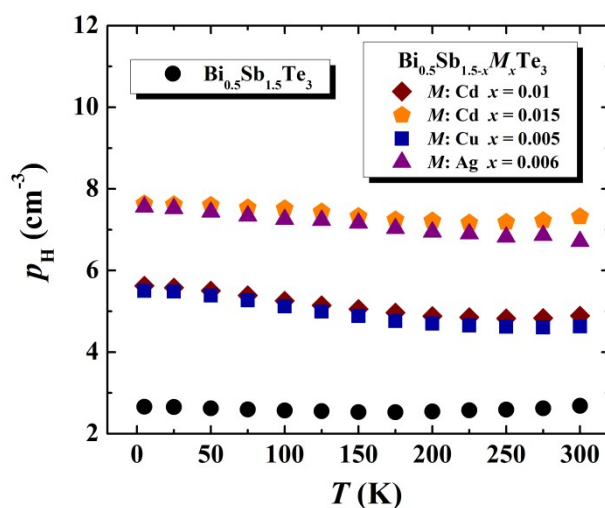

**Fig. S2** Temperature dependence of Hall hole concentration ( $p_H$ ) below 300 K for  $\text{Bi}_{0.5}\text{Sb}_{1.5-x}\text{M}_x\text{Te}_3$  ( $M = \text{Cd}, \text{Cu}, \text{and Ag}$ ) samples.

## Electronic Supplementary Information

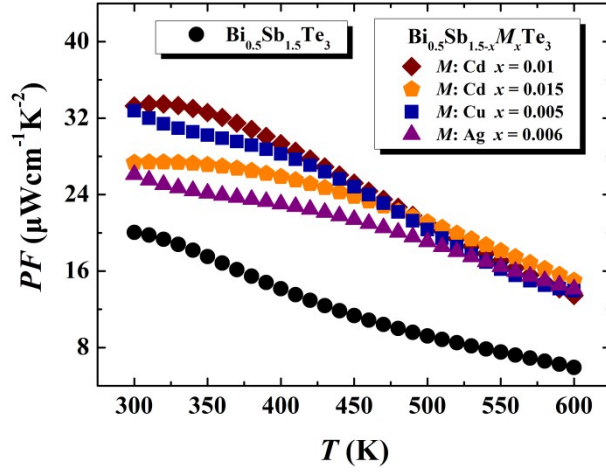

**Fig. S3** Temperature dependence of power factor ( $PF$ ) for  $\text{Bi}_{0.5}\text{Sb}_{1.5-x}\text{M}_x\text{Te}_3$  ( $M = \text{Cd}$ ,  $\text{Cu}$ , and  $\text{Ag}$ ) samples.

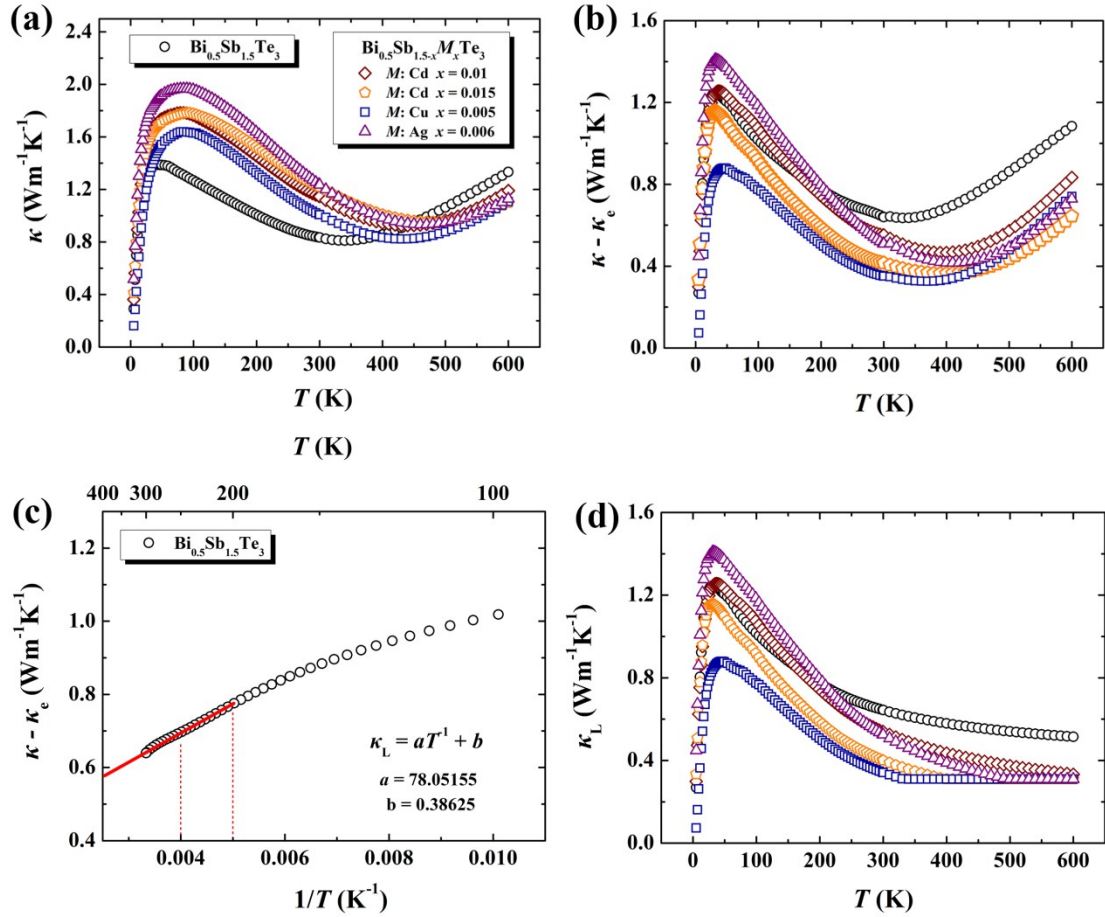

**Fig. S4** Temperature dependences of (a) total  $\kappa$  and (b)  $\kappa - \kappa_e$  for all samples. (c)  $\kappa - \kappa_e$  as a function of temperature for  $\text{Bi}_{0.5}\text{Sb}_{1.5}\text{Te}_3$ . The solid line represents the expression of

## Electronic Supplementary Information

$\kappa_L = aT^{-1} + b$ . (d) Temperature dependence of calculated lattice thermal conductivity ( $\kappa_L$ ) for all samples.

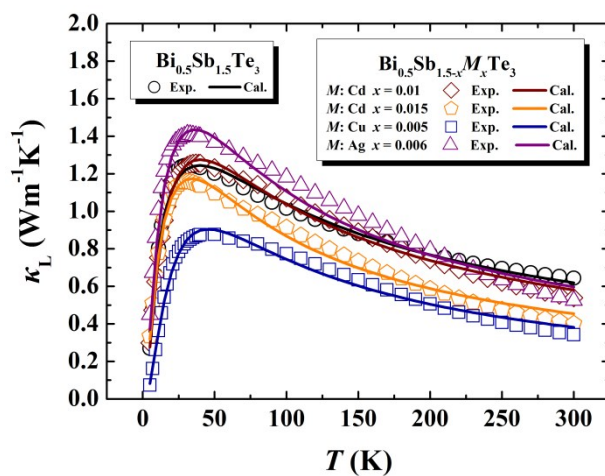

**Fig. S5** Temperature dependence of experimental  $\kappa_L$  (symbols) and calculated  $\kappa_L$  (solid lines) by using Debye model for all samples.

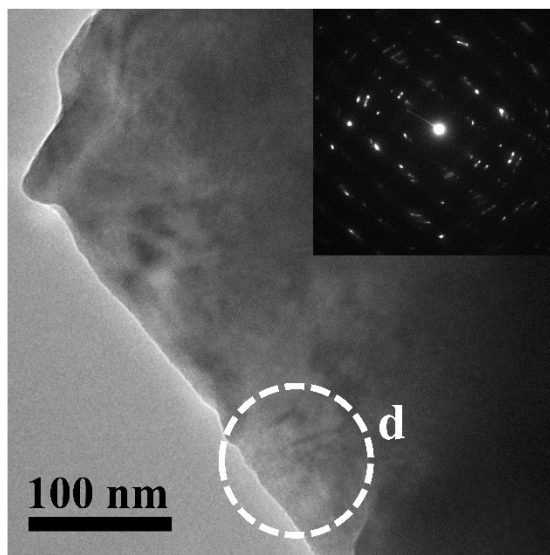

**Fig. S6** Low-magnification TEM image for  $\text{Bi}_{0.5}\text{Sb}_{1.49}\text{Cd}_{0.01}\text{Te}_3$  sample. The insert picture is the electron diffraction pattern of the marked region, in which the nanoscale area in fig. 3d is included.

## Electronic Supplementary Information

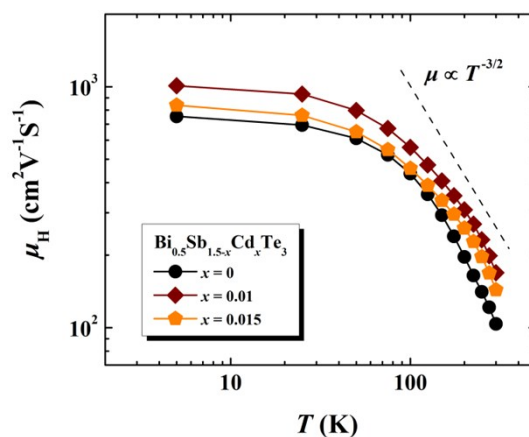

**Fig. S7** Temperature dependence of Hall hole mobility ( $\mu_H$ ) below 300 K for Cd-doped  $\text{Bi}_{0.5}\text{Sb}_{1.5}\text{Te}_3$  samples.

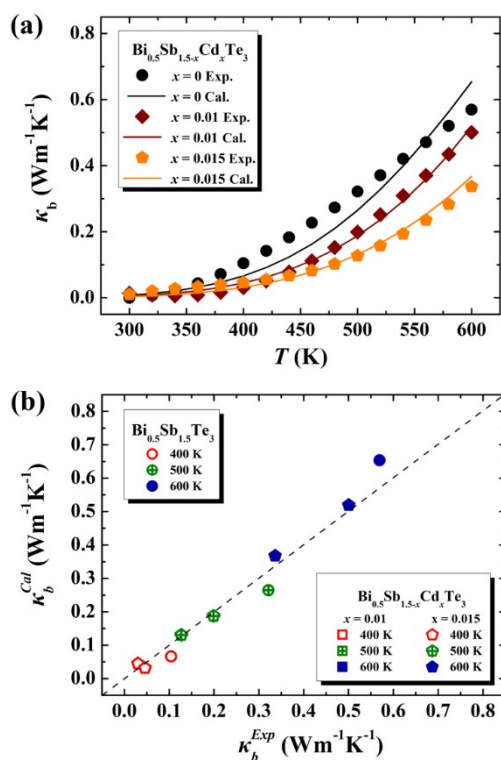

**Fig. S8** (a) Temperature dependence of experimental  $\kappa_b$  for  $\text{Bi}_{0.5}\text{Sb}_{1.5-x}M_x\text{Te}_3$  ( $M = \text{Cd}, \text{Cu}, \text{and Ag}$ ) samples. The solid lines represent the numerical fitted  $\kappa_b$  by Equation S1. The fitting parameters  $B$  for all samples are shown in Table S3. (b) Experimental

## Electronic Supplementary Information

bipolar thermal conductivity ( $\kappa_b^{Exp}$ ) and the fitted bipolar thermal conductivity ( $\kappa_b^{Cal}$ ).

The dash line stands for the relationship of  $\kappa_b^{Exp} = \kappa_b^{Cal}$ .

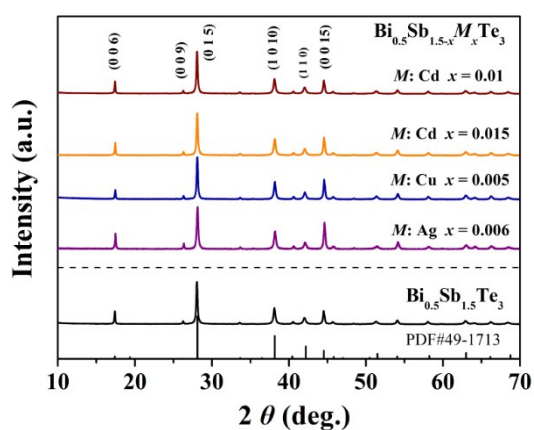

**Fig. S9** Powder XRD patterns for  $\text{Bi}_{0.5}\text{Sb}_{1.5-x}\text{M}_x\text{Te}_3$  ( $M = \text{Cd}, \text{Cu}, \text{and Ag}$ ) samples.

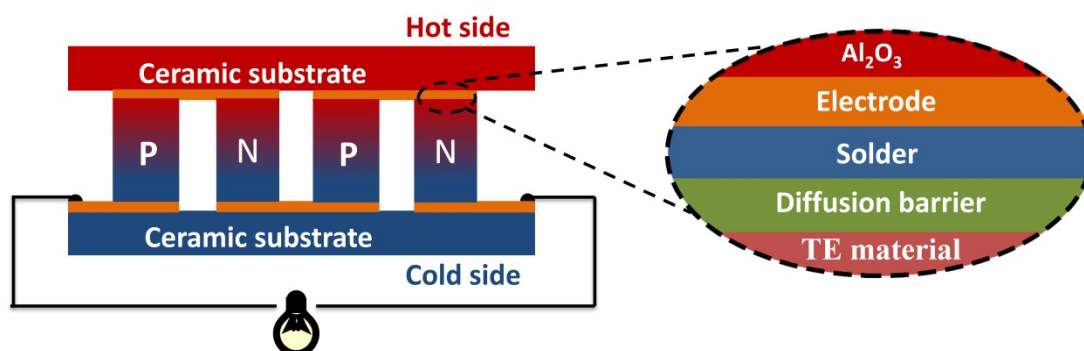

**Fig. S10** Schematic graph of our  $\text{Bi}_2\text{Te}_3$ -based modules.  $\text{Al}_2\text{O}_3$  ceramic is used as the electrically isolated substrate. Cu is used as electrode. SAC305 (96.5% Sn, 3.0% Ag, 0.5% Cu) is the solder. Ni is the diffusion barrier between solder and  $\text{Bi}_2\text{Te}_3$ -based materials.

## Electronic Supplementary Information

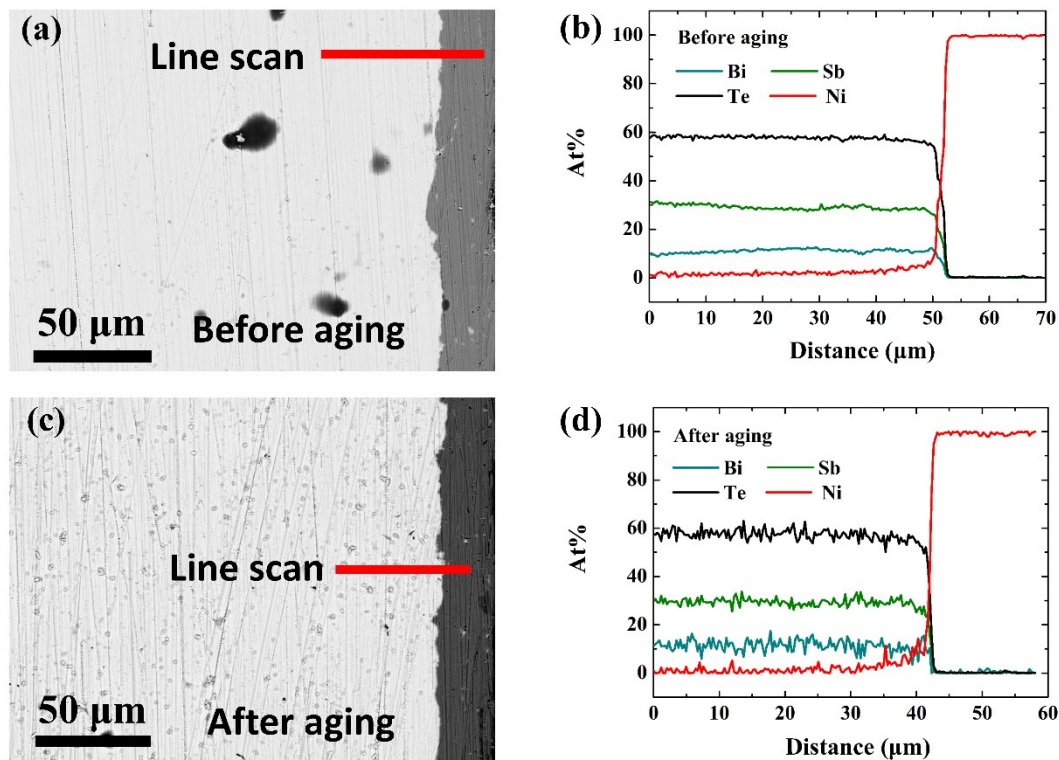

**Fig. S11** SEM images of the interfaces between p-type  $\text{Bi}_2\text{Te}_3$ -based material and Ni diffusion barrier (a) before aging and (c) after aging at 250 °C for 1 hour, with the respective element line scan shown in (b) and (d) by using EDS. No obvious interdiffusions or chemical reactions are observed after high temperature aging.

**Table S1.** Calculated Lorenz number  $L$  using Equation S2 and fitting parameters for all samples using the expression of  $\kappa_L = aT^{-1} + b$  at 200-250 K.

|     | $\text{Bi}_{0.5}\text{Sb}_{1.5}\text{Te}_3$ | $\text{Bi}_{0.5}\text{Sb}_{1.5-x}\text{M}_x\text{Te}_3$ ( $M = \text{Cd}, \text{Cu}, \text{Ag}$ ) |                 |                 |                 |
|-----|---------------------------------------------|---------------------------------------------------------------------------------------------------|-----------------|-----------------|-----------------|
|     |                                             | Cd: $x = 0.01$                                                                                    | Cd: $x = 0.015$ | Cu: $x = 0.005$ | Ag: $x = 0.006$ |
| $L$ | 1.6                                         | 1.7                                                                                               | 1.8             | 1.7             | 1.8             |
| $a$ | 78.05155                                    | 120.38561                                                                                         | 105.27573       | 93.71323        | 163.32963       |
| $b$ | 0.38625                                     | 0.1027                                                                                            | -0.05551        | -0.01816        | -0.01976        |

**Table S2.** Fitting parameters for low temperature lattice thermal conductivity by using the Debye model.

|  | $\text{Bi}_{0.5}\text{Sb}_{1.5}\text{Te}_3$ | $\text{Bi}_{0.5}\text{Sb}_{1.5-x}\text{M}_x\text{Te}_3$ ( $M = \text{Cd}, \text{Cu}, \text{Ag}$ ) |                 |                 |                 |
|--|---------------------------------------------|---------------------------------------------------------------------------------------------------|-----------------|-----------------|-----------------|
|  |                                             | Cd: $x = 0.01$                                                                                    | Cd: $x = 0.015$ | Cu: $x = 0.005$ | Ag: $x = 0.006$ |



## Electronic Supplementary Information

|                                    |       |        |        |        |        |
|------------------------------------|-------|--------|--------|--------|--------|
| $d$ ( $\mu\text{m}$ )              | 1.755 | 0.990  | 1.379  | 0.179  | 1.545  |
| $P$ ( $10^{-41} \text{ s}^3$ )     | 7.409 | 5.373  | 6.722  | 3.754  | 5.396  |
| $U$ ( $10^{-18} \text{ sK}^{-1}$ ) | 9.903 | 13.682 | 18.835 | 28.775 | 13.598 |

**Table S3.** Calculated parameter  $A$  by using Equation 1 and the carrier concentration at 300 K. Parameter  $B$  is fitted from the experimental  $\kappa_b$  by using Equation S1 for all  $\text{Bi}_{0.5}\text{Sb}_{1.5-x}M_x\text{Te}_3$  ( $M = \text{Cd}, \text{Cu}, \text{and Ag}$ ) samples.

|                                   | $\text{Bi}_{0.5}\text{Sb}_{1.5}\text{Te}_3$ | $\text{Bi}_{0.5}\text{Sb}_{1.5-x}M_x\text{Te}_3$ ( $M = \text{Cd}, \text{Cu}, \text{Ag}$ ) |                 |                 |                 |
|-----------------------------------|---------------------------------------------|--------------------------------------------------------------------------------------------|-----------------|-----------------|-----------------|
|                                   |                                             | Cd: $x = 0.01$                                                                             | Cd: $x = 0.015$ | Cu: $x = 0.005$ | Ag: $x = 0.006$ |
| $A$ ( $10^{42} \text{ cm}^{-6}$ ) | 3.1                                         | 2.5                                                                                        | 1.6             | 1.9             | 1.7             |
| $B$ ( $10^3$ )                    | 1.67                                        | 2.6                                                                                        | 3.5             | 2.65            | 3.7             |

## References

- 1 C. Chiritescu, C. Mortensen, D. G. Cahill, D. Johnson, P. Zschack, *J. Appl. Phys.*, 2009, **106**, 073503
- 2 S. Wang, G. Tan, W. Xie, G. Zheng, H. Li, J. Yang, X. Tang, *J. Mater. Chem.*, 2012, **22**, 20943.
- 3 N. Cheng, R. Liu, S. Bai, X. Shi, L. Chen, *J. Appl. Phys.*, 2014, **115**, 163705.
